# Supplementary material
Source: PubMed Central journal article supplement (PMC4589304)
Supplement: Supp_Table1.pdf [file Supp_Table1.pdf]

## Supplementary Data

SUPPLEMENTARY TABLE S1. DEFINITIONS OF PREGNANCY COMPLICATIONS, MEDICAL COMORBIDITIES, AND HEALTHCARE UTILIZATION VARIABLES

| Definitions of pregnancy                    |                                                                                                                                                                                                                                                                                                                                                                                                                                                                                                                                                             |
|---------------------------------------------|-------------------------------------------------------------------------------------------------------------------------------------------------------------------------------------------------------------------------------------------------------------------------------------------------------------------------------------------------------------------------------------------------------------------------------------------------------------------------------------------------------------------------------------------------------------|
| Delivery definition to select cohort (18)   | ICD-9-CM codes: 650 (normal delivery), 651 (multiple gestation), V27.0 (outcome of delivery, single liveborn), V27.1 (outcome of delivery, single stillborn), V27.2 (outcome of delivery, twins, both liveborn), V27.3 (outcome of delivery, twins, 1 liveborn, 1 stillborn), V27.4 (outcome of delivery, other multiple births, all liveborn), V27.5 (outcome of delivery, other multiple births, all liveborn), V27.6 (outcome of delivery, other multiple births, some liveborn)                                                                         |
| Pregnancy complications                     |                                                                                                                                                                                                                                                                                                                                                                                                                                                                                                                                                             |
| Gestational diabetes                        | 648.8* (abnormal glucose tolerance in pregnancy) at any point in defined 40-week pregnancy period OR 250.** (diabetes mellitus) ≤20 weeks before delivery date (i.e., weeks 20–40) OR 648.0* (abnormal glucose tolerance in pregnancy) ≤20 weeks before delivery date (i.e., weeks 20–40) and not meeting criteria for preconception diabetes below (if it meets the below criteria, then it is defined as “preconception diabetes”)                                                                                                                        |
| Preeclampsia (mild or severe) and eclampsia | ICD-9-CM diagnosis codes: 642.4* (mild preeclampsia), 642.5 (severe preeclampsia); ICD-9-CM diagnosis codes: 642.6* (eclampsia)                                                                                                                                                                                                                                                                                                                                                                                                                             |
| Gestational hypertension                    | ICD-9-CM diagnosis codes: 642.3* (transient hypertension in pregnancy) or 642.9* (unspecified hypertension complicating pregnancy) and not meeting the below definition for chronic hypertension                                                                                                                                                                                                                                                                                                                                                            |
| Preterm labor or delivery of preterm infant | ICD-9-CM diagnosis codes: 644.0 (threatened premature labor), 644.00 (threatened premature labor unspecified as to episode of care), 644.03 (threatened premature labor antepartum), 644.1 (Other threatened labor), 644.10 (other threatened labor unspecified as to episode of care), 644.13 (other threatened labor antepartum), 644.2* (early onset of delivery)                                                                                                                                                                                        |
| Smoking                                     | 305.1* (tobacco use disorder) or 649.0 (tobacco use disorder complicating pregnancy)                                                                                                                                                                                                                                                                                                                                                                                                                                                                        |
| Preconception medical comorbidities         |                                                                                                                                                                                                                                                                                                                                                                                                                                                                                                                                                             |
| Chronic hypertension                        | ICD-9-CM diagnosis codes: 642.0* (benign essential hypertension complicating pregnancy), 642.2* (other preexisting hypertension complicating pregnancy)                                                                                                                                                                                                                                                                                                                                                                                                     |
| Preconception diabetes                      | ICD-9-CM diagnosis code 250.** (diabetes mellitus) identified more than 20 weeks prior to delivery date (i.e. pregnancy weeks 1–19, not 20–40) or ICD-9-CM diagnosis code 648.0* >20 weeks prior to delivery (i.e. pregnancy weeks 1–19, not 20–40) or A prescription claim for a diabetes medication (see definition below) more than 20 weeks prior to delivery (i.e., pregnancy weeks 1–20, not 21–40)                                                                                                                                                   |
| Obesity                                     | ICD-9-C M diagnostic codes: 278.** or 649.1 (obesity complicating pregnancy)                                                                                                                                                                                                                                                                                                                                                                                                                                                                                |
| Asthma                                      | ICD-9 C M diagnostic codes: 401.1                                                                                                                                                                                                                                                                                                                                                                                                                                                                                                                           |
| Psychiatric disorder                        | 648.4* (mental disorder complicating pregnancy) or 300.** (anxiety disorder) or 295.** (schizophrenia) or 296.4* or 296.1* or 296.0* or 296.5* or 296.6* or 296.7 or 296.8* (bipolar disorder) or 296.2* (major depression, single episode) or 296.3* (major depression, recurrent) or 311.* (depressive disorder, NOS)                                                                                                                                                                                                                                     |
| Substance abuse disorder                    | 304.** (drug dependence, not including alcohol) or 305.5* (opioid abuse) or 35.6* (cocaine abuse) or 648.3* (drug dependence in pregnancy) or 305.6 (cocaine abuse) or 305.5 (opioid abuse) or 303.** (dependence) or 305.0 (alcohol abuse)                                                                                                                                                                                                                                                                                                                 |
| Definitions of utilization of care outcomes |                                                                                                                                                                                                                                                                                                                                                                                                                                                                                                                                                             |
| Primary care outpatient visits              | One of the following visit types with a designated primary care provider (e.g., family medicine, primary care nurse practitioner, internal medicine)<br>CPT codes: 99201-99205 (new patient visit), 99211-99215 (established patient visit), 99024 (postoperative check), 99241-99245 (consultation), 99381-99387 (preventive medicine visit), 99384 (adolescent visit, age 12–17 years), 99394 (adolescent visit, age 12–17years) and a specialty code corresponding to any primary care provider (e.g.; internal medicine, family medicine; MD, NP or PA) |

CPT, current procedural terminology; ICD-9, *International Classification of Diseases*, ninth revision; ICD-9-CM, ICD-9 Clinical Modification; MD, medical doctor; NP, nurse practitioner; PA, physician assistant.
