# Supplementary material
Source: PubMed Central journal article supplement (PMC4589304)
Supplement: Supp_Table2.pdf [file Supp_Table2.pdf]

SUPPLEMENTARY TABLE 2. ATTENUATION OF EFFECT OF PREGNANCY COMPLICATION ON EMERGENCY ROOM UTILIZATION BY CONFOUNDING COVARIATES

| <i>Model</i>                                                                                            | <i>OR</i> | <i>95% CI</i> |
|---------------------------------------------------------------------------------------------------------|-----------|---------------|
| Model 1: Pregnancy complication: unadjusted model                                                       | 1.24      | 1.16–1.33     |
| Model 2: Pregnancy complication<br>Adjusted for: maternal age, race, % of neighborhood living below FPL | 1.27      | 1.18–1.36     |
| Model 3: Pregnancy complication<br>Adjusted for cesarean deliveries and medical comorbidity             | 1.16      | 1.07–1.25     |
| Model 4: Pregnancy complication<br>Adjusted for early prenatal Care                                     | 1.15      | 1.07–1.25     |
| Model 5: Pregnancy complication<br>Adjusted for postpartum OB visit and postpartum PCP visit            | 1.14      | 1.06–1.24     |
| Model 6: Pregnancy complication<br>Adjusted for preconception insurance coverage                        | 1.15      | 1.06–1.24     |

CI, confidence interval; FPL, federal poverty level; OB, obstetrician; OR, odds ratio; PCP, primary care physician.
